# Supplementary material for: An unprecedented azobenzene-based organic single-component ferroelectric
Source: Royal Society of Chemistry journal article supplement (doi:10.1039/d2sc00689h), 2022-01-01
Supplement: d2sc00689h1.pdf [file d2sc00689h1.pdf]

## Electronic Supplementary Information

### An Unprecedented Azobenzene-Based Organic Single-Component Ferroelectric

Hang Peng,<sup>‡</sup> Jun-Chao Qi,<sup>‡</sup> Xian-Jiang Song, Ren-Gen Xiong\* and Wei-Qiang Liao\*

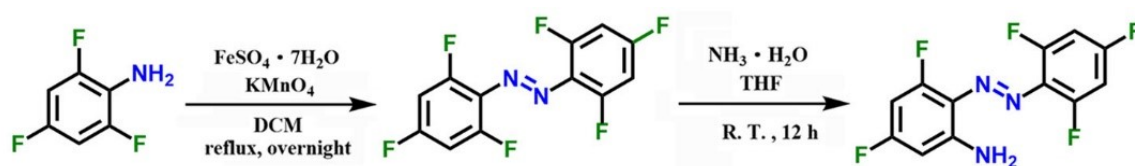

**Fig. S1** The synthesis of APFA.

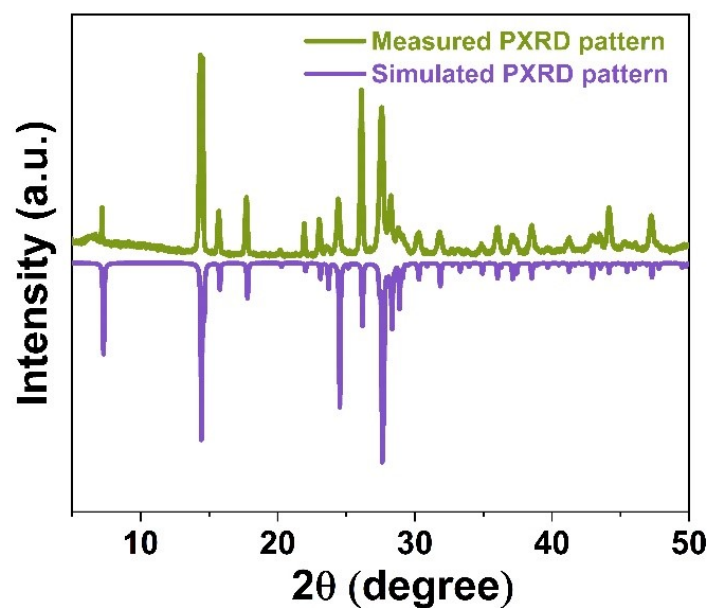

**Fig. S2** The measured PXRD pattern of APFA at 298 K matches well with the simulated one, verifying the purity of the bulk phase.

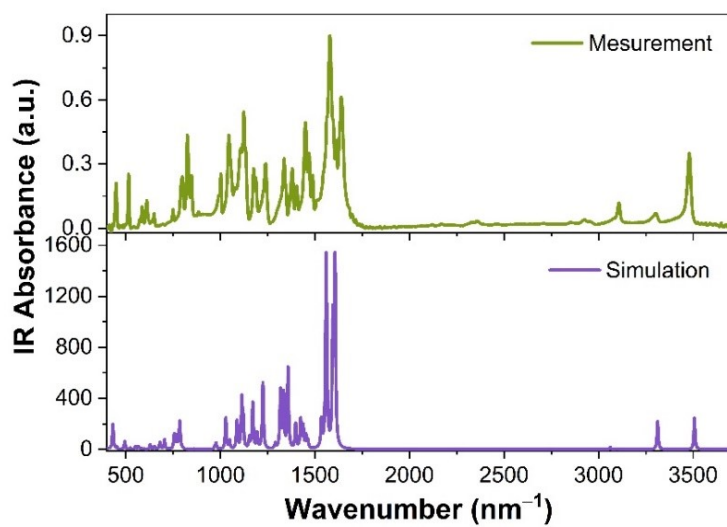

Fig. S3 Measured (top) and calculated (bottom) IR spectra of APFA.

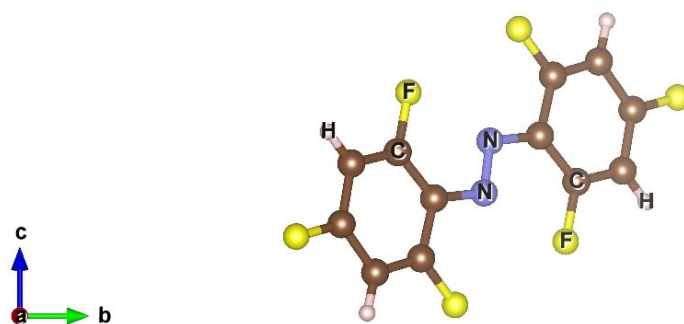

Fig. S4 Crystal structure of HFA.

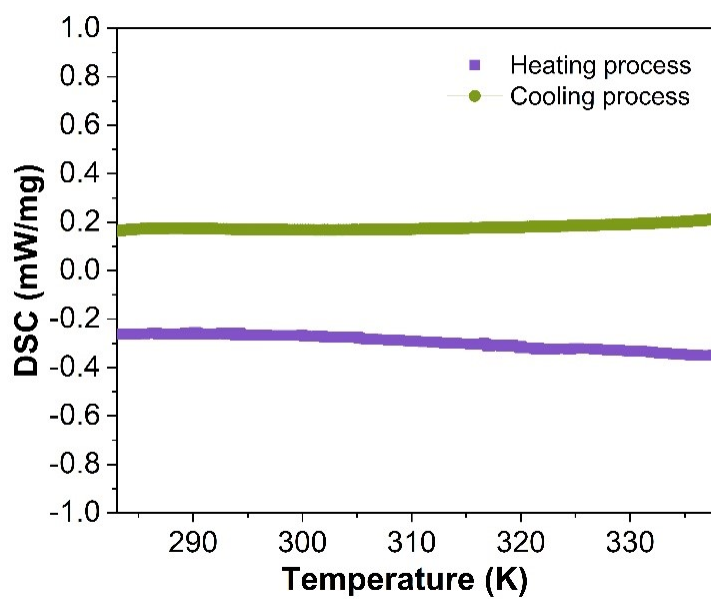

Fig. S5 DSC curve of HFA.

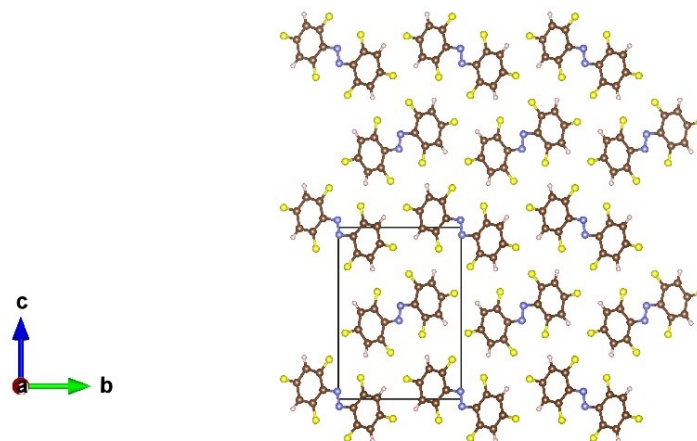

**Fig. S6** Packing views of the structure of HFA at 298 K along *a* axis.

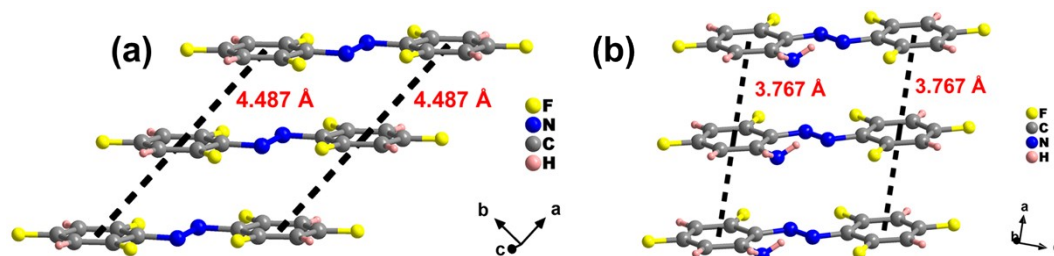

**Fig. S7** The  $\pi$ - $\pi$  interactions (dash lines) in the structures of HFA (a) and APFA (b) with the labeled  $\pi$ - $\pi$  distances, showing the decrease of  $\pi$ - $\pi$  distance between neighboring molecules after substitution with an amino group.

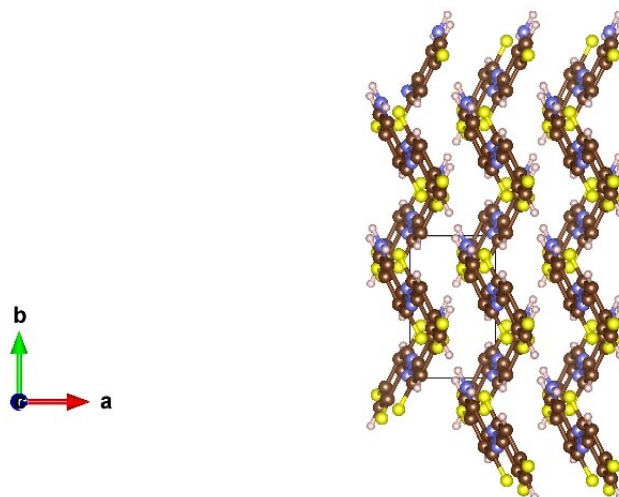

**Fig. S8** Packing views of the structure of APFA at 298 K along *c* axis.

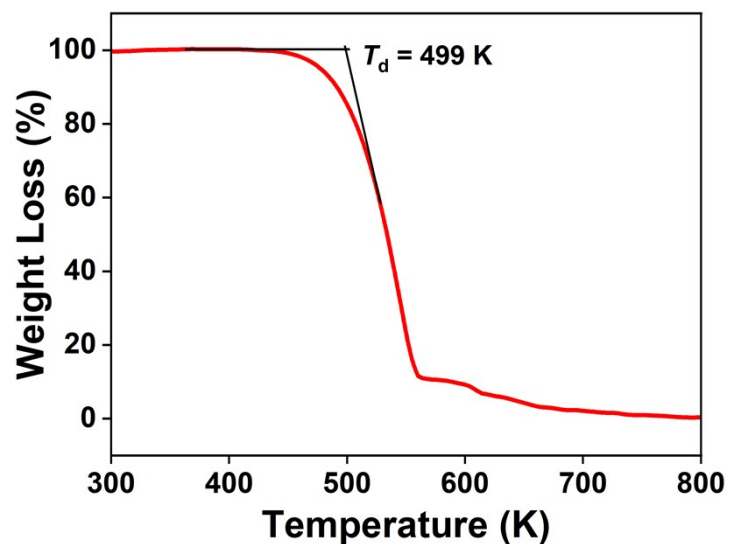

**Fig. S9** TGA curves of APFA recorded from 300 K to 800 K by PerkinElmer TGA 8000 in a nitrogen atmosphere.

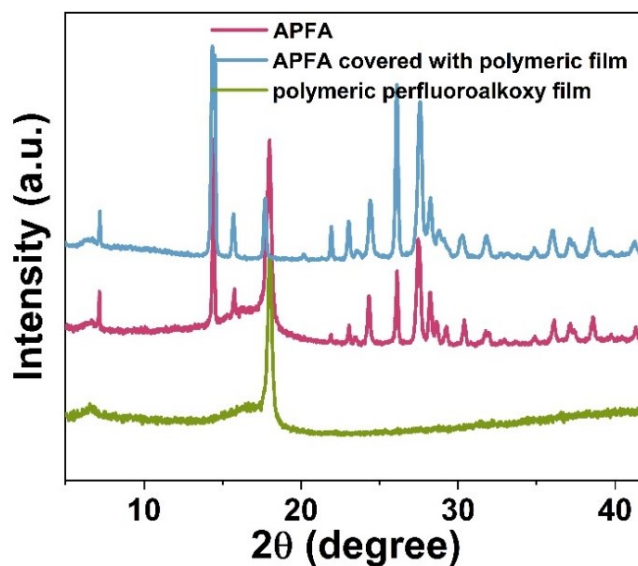

**Fig. S10** PXRD patterns of APFA, APFA sample covered with the polymeric film and the polymeric perfluoroalkoxy film at 298 K.

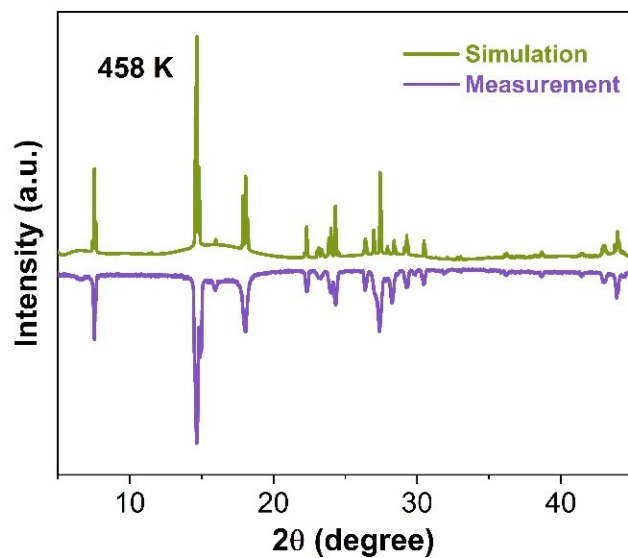

**Fig. S11** Pawley refinement of PXRD data of APFA collected at 458 K with monoclinic unit cell.

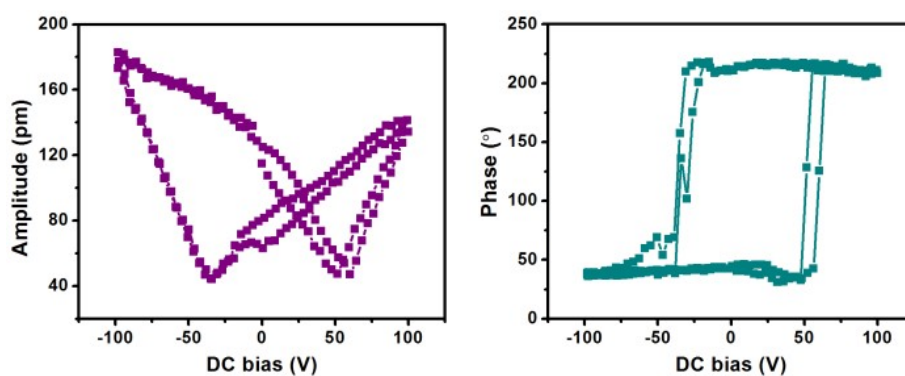

**Fig. S12** The PFM switching spectroscopy measurements for the APFA thin film. PFM amplitude loops (left) and PFM phase loops (right).

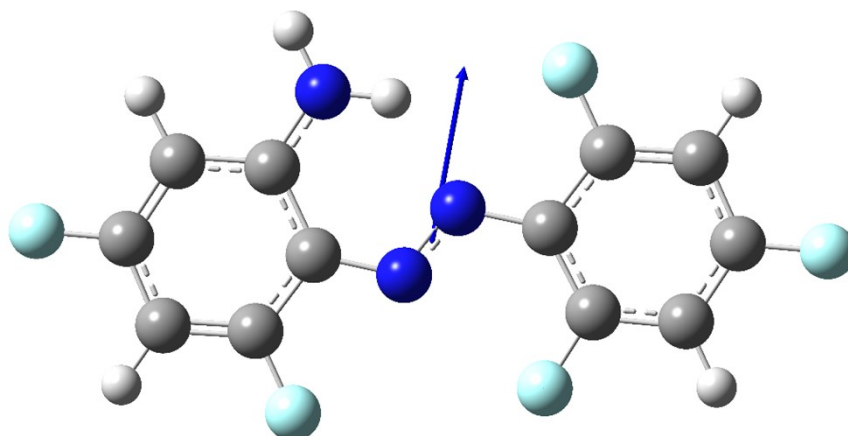

**Fig. S13** The dipole moment direction of APFA molecule depicted with a blue arrow.

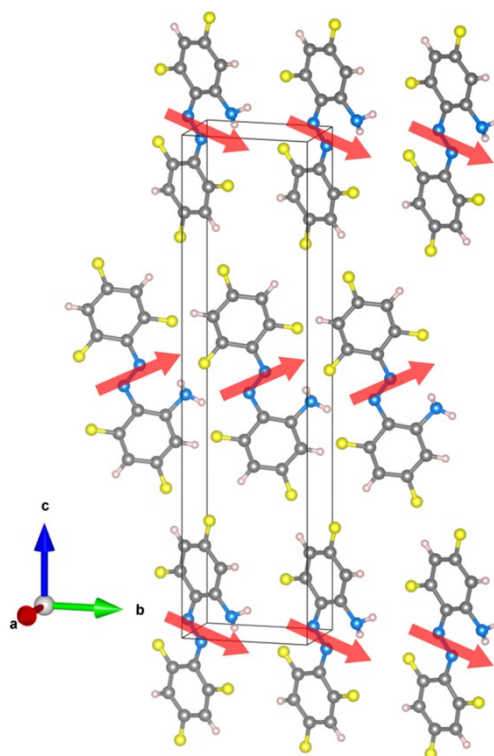

**Fig. S14** Schematic diagram of the distribution of molecular dipoles in the unit cell. The red arrow represents the direction of the molecular dipole.

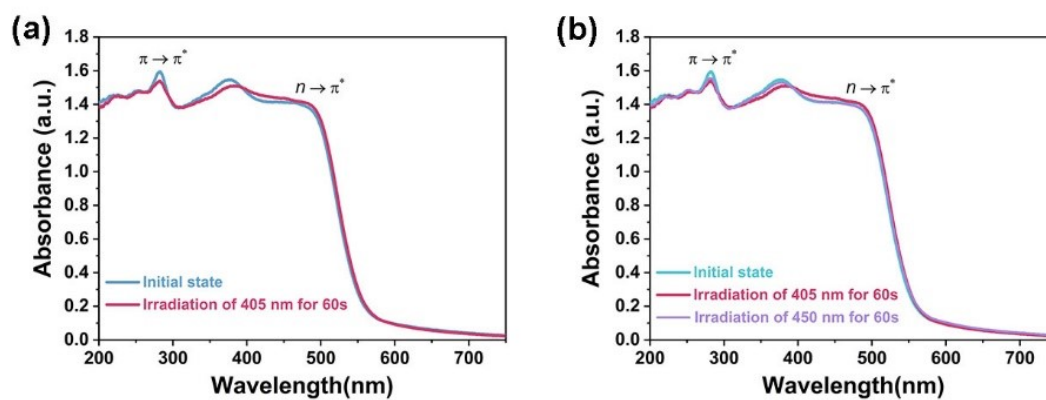

**Fig. S15** Solid-state UV-Vis absorption spectra of APFA at 293 K (a) before and after the irradiation of 405 nm for 60 s and (b) after the irradiation of 450 nm for 60 s.

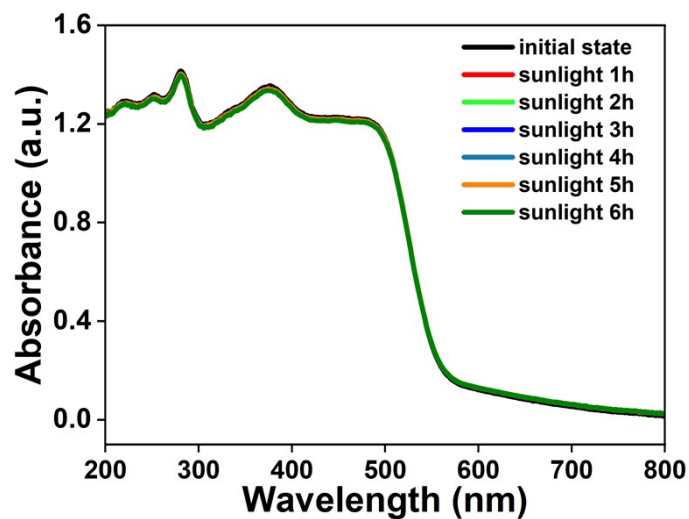

**Fig. S16** Solid-state UV-vis absorption spectra of APFA recorded before and after open- air exposure under the sunlight from 1h to 6h.

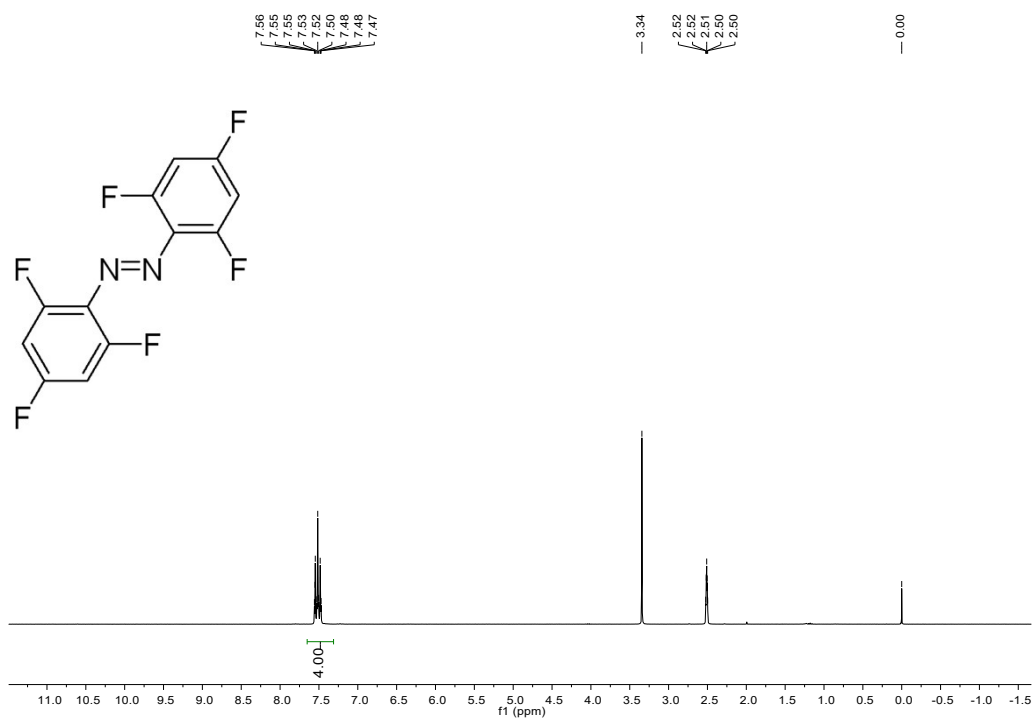

**Fig. S17**  $^1\text{H}$  NMR spectrum of HFA (300 MHz,  $\text{DMSO-}d_6$ ).

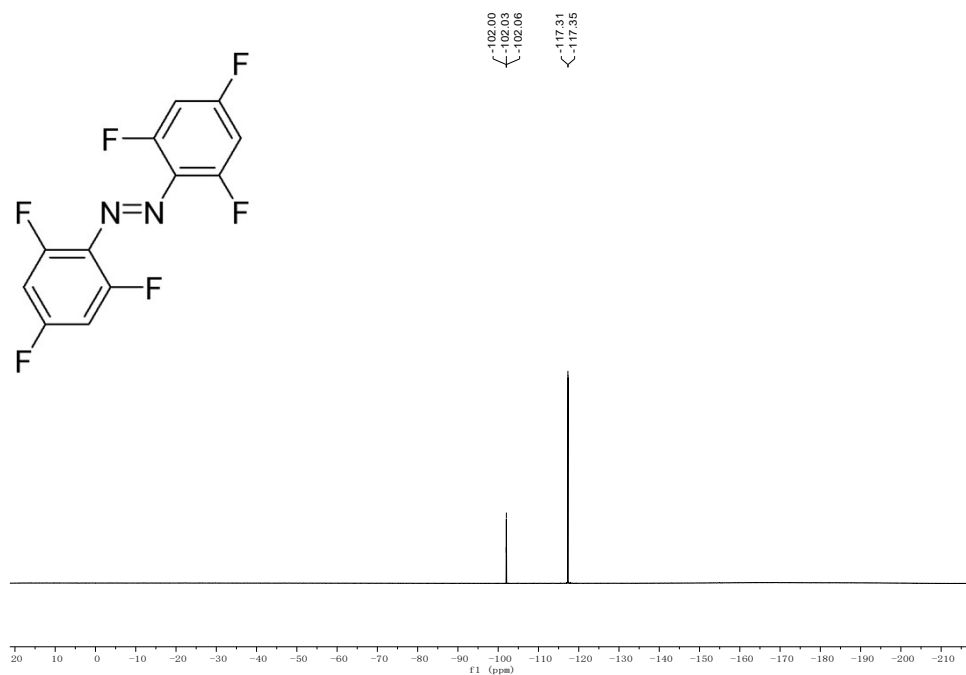

**Fig. S18**  $^{19}\text{F}$  NMR spectrum of HFA (282 MHz,  $\text{DMSO-}d_6$ ).

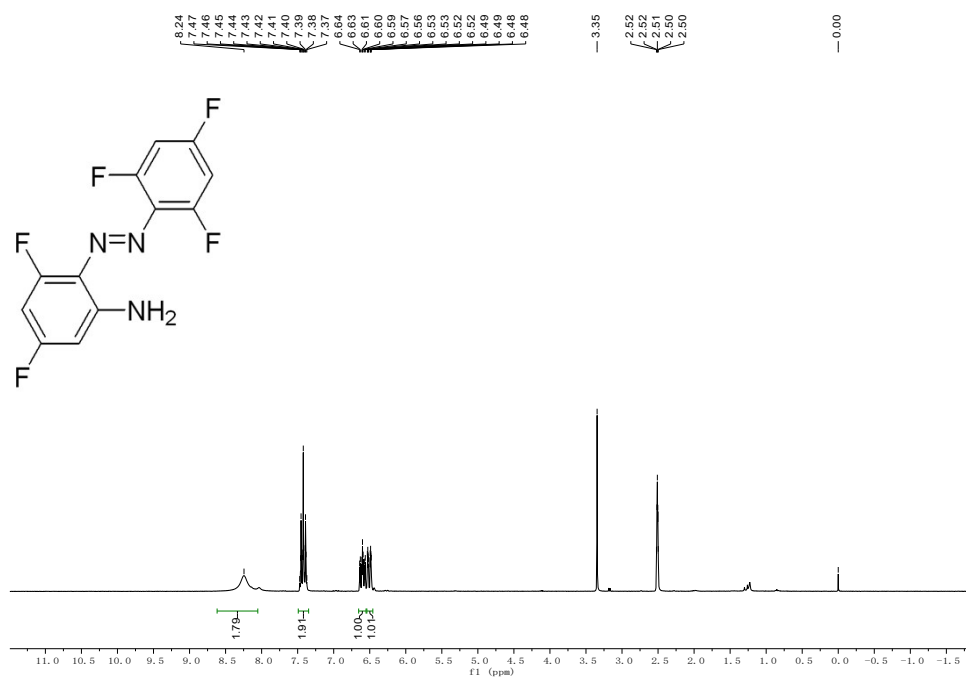

**Fig. S19**  $^1\text{H}$  NMR spectrum of APFA (300 MHz,  $\text{DMSO-}d_6$ ).



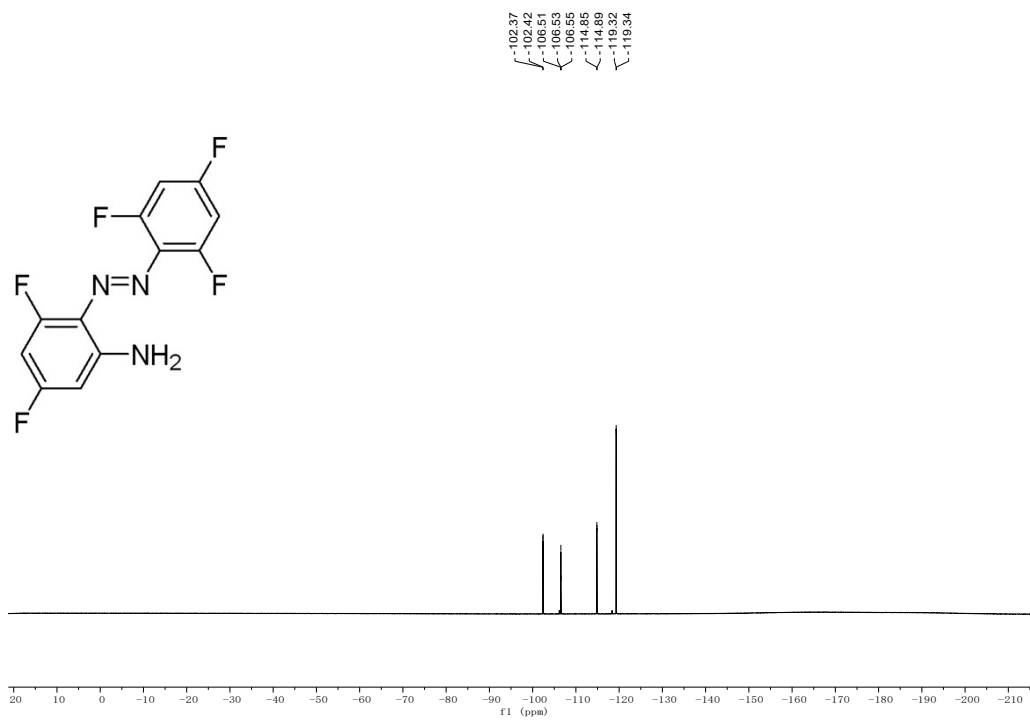

**Fig. S20**  $^{19}\text{F}$  NMR spectrum of APFA (282 MHz,  $\text{DMSO-}d_6$ ).

**Table S1.** Crystal data and structure refinements for APFA and HFA at 298 K.

| Compound                   | APFA                                                         | HFA                                                          |
|----------------------------|--------------------------------------------------------------|--------------------------------------------------------------|
| Temperature                | 298 K                                                        |                                                              |
| Formula                    | C <sub>12</sub> H <sub>6</sub> F <sub>5</sub> N <sub>3</sub> | C <sub>12</sub> H <sub>4</sub> F <sub>6</sub> N <sub>2</sub> |
| Formula weight             | 287.20                                                       | 290.17                                                       |
| Crystal system             | monoclinic                                                   | monoclinic                                                   |
| Space group                | <i>P</i> 2 <sub>1</sub>                                      | <i>P</i> 2 <sub>1</sub> / <i>n</i>                           |
| <i>a, b, c</i> (Å)         | 3.76719(12)                                                  | 4.4870(3)                                                    |
|                            | 6.2632(2)                                                    | 9.3652(6)                                                    |
|                            | 24.1516(7)                                                   | 13.1716(8)                                                   |
| <i>α, β, γ</i> (°)         | 90                                                           | 90                                                           |
|                            | 92.008(3)                                                    | 97.270(6)                                                    |
|                            | 90                                                           | 90                                                           |
| Volume /Å <sup>3</sup>     | 569.50(3)                                                    | 549.04(6)                                                    |
| <i>Z</i>                   | 2                                                            | 2                                                            |
| Density/g cm <sup>-3</sup> | 1.675                                                        | 1.755                                                        |
| <i>R</i> <sub>1</sub>      | 0.0539                                                       | 0.0485                                                       |
| <i>wR</i> <sub>2</sub>     | 0.1505                                                       | 0.1165                                                       |
| GOF                        | 1.124                                                        | 1.018                                                        |

**Table S2.** Bond Lengths for APFA.

| Atom | Atom | Length/Å | Atom | Atom | Length/Å  |
|------|------|----------|------|------|-----------|
| F3   | C6   | 1.348(7) | F2   | C4   | 1.354(4)  |
| F4   | C8   | 1.342(7) | C11  | C10  | 1.356(7)  |
| C1   | N2   | 1.386(4) | C5   | C4   | 1.391(10) |
| C1   | C6   | 1.369(7) | C5   | C6   | 1.360(5)  |
| C1   | C2   | 1.462(7) | F1   | C2   | 1.303(5)  |
| C12  | N3   | 1.376(5) | C4   | C3   | 1.366(7)  |
| C12  | C11  | 1.408(5) | C9   | C8   | 1.379(5)  |
| C12  | C7   | 1.355(8) | C9   | C10  | 1.359(9)  |
| F5   | C10  | 1.359(4) | C7   | C8   | 1.433(7)  |
| N1   | N2   | 1.265(3) | C2   | C3   | 1.380(5)  |
| N1   | C7   | 1.411(5) |      |      |           |

**Table S3.** Bond Angles for APFA.

| Atom | Atom | Atom | Angle/°  | Atom | Atom | Atom | Angle/°  |
|------|------|------|----------|------|------|------|----------|
| N2   | C1   | C2   | 127.5(4) | F3   | C6   | C5   | 116.4(5) |
| C6   | C1   | N2   | 116.8(5) | C5   | C6   | C1   | 126.6(5) |
| C6   | C1   | C2   | 115.7(3) | C12  | C7   | N1   | 131.0(4) |
| N3   | C12  | C11  | 115.9(5) | C12  | C7   | C8   | 116.3(4) |
| C7   | C12  | N3   | 121.9(4) | N1   | C7   | C8   | 112.6(5) |
| C7   | C12  | C11  | 122.2(5) | F4   | C8   | C9   | 119.2(4) |
| N2   | N1   | C7   | 114.5(3) | F4   | C8   | C7   | 118.4(4) |
| C10  | C11  | C12  | 118.1(5) | C9   | C8   | C7   | 122.4(5) |
| N1   | N2   | C1   | 116.8(4) | F1   | C2   | C1   | 119.6(3) |
| C6   | C5   | C4   | 114.6(5) | F1   | C2   | C3   | 120.9(5) |
| F2   | C4   | C5   | 117.4(4) | C3   | C2   | C1   | 119.5(4) |
| F2   | C4   | C3   | 117.8(5) | C4   | C3   | C2   | 118.8(5) |
| C3   | C4   | C5   | 124.7(4) | F5   | C10  | C9   | 117.9(5) |
| C10  | C9   | C8   | 117.3(5) | C11  | C10  | F5   | 118.4(5) |
| F3   | C6   | C1   | 117.0(4) | C11  | C10  | C9   | 123.6(4) |

**Table S4.** Hydrogen-bond geometry (Å, °) for APFA.

| D–H···A     | D–H / Å | H···A / Å | D···A / Å | D–H–A / ° |
|-------------|---------|-----------|-----------|-----------|
| N3–H3A···N2 | 0.86    | 2.14      | 2.696(6)  | 121.8     |
